# Supplementary material
Source: HighWire-hosted journal article supplement (https://bmjopen.bmj.com/content/8/7/e020411)

## APPENDIX A

**Figure 1.** Probability-probability chart for patient experience regression

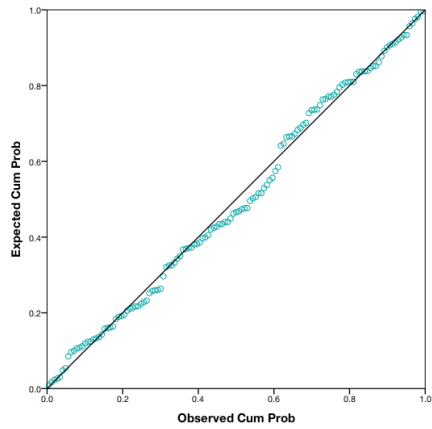

**Figure 2.** Probability-probability chart for staff experience regression

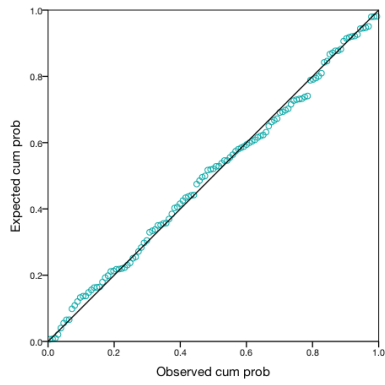

Supplement: inline-supplementary-material-1 [file inline-supplementary-material-1.pdf]
